# Supplementary material for: Evaluation of the efficacy and safety of a precise thymalfasin-regulated PRaG regimen for advanced refractory solid tumours: protocol for the open-label, prospective, multicentre study (PRaG5.0 study)
Source: HighWire-hosted journal article supplement (doi:10.1136/bmjopen-2023-075642), 2024-03-01
Supplement: bmjopen-2023-075642supp001_data_supplement.pdf [file bmjopen-2023-075642supp001_data_supplement.pdf]

### List of Participating Clinical Trial Institutions

| Number | Institution                                          | Ethical approval status |
|--------|------------------------------------------------------|-------------------------|
| 01     | The Second Affiliated Hospital of Soochow University | Yes                     |
| 02     | The First Affiliated Hospital of Soochow University  | Yes                     |
| 03     | Zhejiang Cancer Hospital                             | Yes                     |
| 04     | Shandong Cancer Hospital                             | Yes                     |
| 05     | Fujian Cancer Hospital                               | Yes                     |
